# Supplementary material
Source: PubMed Central journal article supplement (PMC6177645)
Supplement: ba010744-suppl1.pdf [file ba010744-suppl1.pdf]

# Supplementary data to:

## Cell lineage level-targeted sequencing to identify acute myeloid leukemia with myelodysplasia related changes

Kazuaki Yokoyama,<sup>1</sup> Eigo Shimizu,<sup>2\*</sup> Nozomi Yokoyama,<sup>3\*</sup> Sousuke Nakamura,<sup>5\*</sup>  
Rika Kasajima,<sup>4\*</sup> Miho Ogawa,<sup>5</sup> Tomomi Takei,<sup>5</sup> Mika Ito,<sup>5</sup> Asako Kobayashi,<sup>5</sup> Rui  
Yamaguchi,<sup>2</sup> Seiya Imoto,<sup>4</sup> Satoru Miyano<sup>2</sup> & Arinobu Tojo<sup>1, 5+</sup>

\*These authors contributed equally to this work.

<sup>1</sup>Department of Hematology/Oncology, Research Hospital, Institute of Medical Science, University of Tokyo, Tokyo, Japan.

<sup>2</sup> Laboratory of DNA Information Analysis, Human Genome Center, Institute of Medical Science, University of Tokyo, Tokyo, Japan.

<sup>3</sup>Department of Applied Genomics, Research Hospital, Institute of Medical Science, University of Tokyo, Tokyo, Japan.

<sup>4</sup>Division of Health Medical Data Science, Health Intelligence Center, Institute of Medical Science, University of Tokyo, Tokyo, Japan.

<sup>5</sup>Division of Molecular Therapy, Advanced Clinical Research Center, Institute of Medical Science, University of Tokyo, Tokyo, Japan.

<sup>†</sup>Corresponding author: A.T.

Arinobu Tojo

Department of Hematology/Oncology, Research Hospital, Institute of Medical Science,

University of Tokyo, 4-6-1 Shirokanedai, Minato-ku, Tokyo 108-8639, Japan

E-mail: [a-tojo@ims.u-tokyo.ac.jp](mailto:a-tojo@ims.u-tokyo.ac.jp)

Phone: 81-3-5449-5633

Fax: 81-3-5540-5429

## **ONLINE METHODS:**

### **Patients**

Our study protocol was approved by the ethical evaluation committee (24-27/26-112-270402) of the Institute of Medical Science at the University of Tokyo and was in accordance with the Declaration of Helsinki. Forty-three patients were recruited for our study, all of whom provided written informed consent.

### **Cell lineage level-targeted sequencing workflows**

A summary of the cell lineage level-targeted sequencing workflow is shown in Supplementary Table 2; the workflow consisted of five steps with their associated methodologies, which are described below.

### **STEP 1: Flow cytometry sorting of trio fractions**

Forty-three fresh or 10% DMSO cryopreserved mononuclear cells from diagnostic samples (bone marrow or peripheral blood) were used. Single-cell suspensions consisting of  $1 \times 10^7$  cells suspended in 1 mL of ice-cold phosphate-buffered saline

(PBS) supplemented with 2% calf serum and 1 mM EDTA, were stained with an anti-human fluorescence-conjugated specific antibody for CD34 (AlexaFluor647, BD Biosciences, San Jose, CA, USA), CD66b-Pacific Blue, CD3-allophycocyanin (APC)-CY7, CD14-Brilliant Violet 605 (all three from Biolegend, San Diego, CA, USA), or CD45-Violet 500 (Invitrogen, Carlsbad, CA, USA) according to manufacturer's instructions. After filtering with a cell strainer (BD Biosciences) and addition of CD235a/propidium iodide (PI) (Biolegend), trio fractions were sorted on a FACS Aria (BD Biosciences) using the following gating: granulocytes:  $CD235a/PI^{negative} CD45^{dull}$  sideways scatter (SSC)<sup>high</sup>  $CD14^{negative} CD66b^{high}$ ; blast cells:  $CD235a/PI^{negative} CD45^{dull}$   $SSC^{low} CD14^{negative} CD66b^{negative} CD34^{+}$ ; and T cells:  $CD235a/PI^{negative} CD45^{high} SSC^{low} CD14^{negative} CD3^{+}$ . In cases of CD34-negative blast-enriched cases with AML, we sorted the  $CD235a/PI^{negative} CD45^{dull} CD66b^{negative} CD34^{negative}$  blast fraction as a representation of the blast fraction. Fifty-thousand sorted trios and residual unfractionated samples were stored as cell pellets at -20 °C for future use.

Representative sorting plots are shown in Supplementary Figure 1. The sorting purity of granulocytes from either fresh or cryopreserved samples were confirmed by cyto-spin

preparations followed by May-Grünwald-Giemsa staining (Supplementary Figure 2)

with observed purities of  $99.3 \pm 0.3\%$  ( $n = 3$ ) or  $98 \pm 0.5\%$  ( $n = 3$ ), respectively.

## **STEP 2: Initial mutational screening of flow-sorted trios by targeted deep sequencing**

DNA was extracted using a Gentra Puregene Blood kit (Qiagen, Valencia, CA, USA) and quantified using a Qubit DNA HS assay kit (Life Technologies, Carlsbad, CA, USA). Enrichment of 568 amplicons in 54 genes (141 kb) commonly mutated in MDS and AML was performed using 20 ng of genomic DNA from flow-sorted trios (and buccal swab) via the TruSight Myeloid Panel (Illumina, San Diego, CA, USA).

Targeted exons of genes included in the myeloid panel are listed in Supplementary Table 3. Targeted deep sequencing of 250-bp paired-end reads was performed on a MiSeq with Reagent kit v3 (Illumina).

## **STEP 3: Variant calling of targeted deep sequencing data**

We used human genome build 19 (hg19) as the reference sequence in our analysis. To minimize the risk of false positives and to focus on the most relevant somatic events, we used two independent analysis pipelines for identifying somatic and germline alterations. Single nucleotide variants (SNVs) were identified using a pipeline consisting of MiSeq Reporter v2.5 ([http://support.illumina.com/content/dam/illumina-support/documents/documentation/chemistry\\_documentation/samplepreps\\_truseq/truseqcustomamplicon/truseq-custom-amplicon-15-reference-guide-15027983-02.pdf](http://support.illumina.com/content/dam/illumina-support/documents/documentation/chemistry_documentation/samplepreps_truseq/truseqcustomamplicon/truseq-custom-amplicon-15-reference-guide-15027983-02.pdf)) and Genomon2 (<http://genomon.hgc.jp/exome/en/>), whereas structural variants (SVs) such as *FLT3* internal tandem duplications (ITD) were identified using a pipeline composed of Pindel (<http://gmt.genome.wustl.edu/packages/pindel/>) and Genomon-SV (<https://github.com/Genomon-Project/GenomonSV>).

For our analysis using the MiSeq Reporter pipeline, paired-end read fastq files were automatically processed using MiSeq Reporter v2.5, according to the manufacturer's provided workflow, which requires both fastq files and a manifest file for input. The manifest file contains information including the sequences of the primer pairs, the expected sequence of the amplicons, and the coordinates relative to the reference

genome (hg19). As a workflow output, a VCF file that contains a list of variants is generated for each sample. Briefly, each read pair is separately processed to individually identify the corresponding primer pair (allowing one mismatch). Next, it is aligned to the expected amplicon sequence (primers excluded) via a banded Smith-Waterman algorithm, allowing gaps a maximum of one third of its length. Variant calling was performed using the Genome Analysis ToolKit (GATK) v1.6 (<https://software.broadinstitute.org/gatk/>) using generated BAM files.

#### **STEP 4: Annotation and filtering of variants using an in-house pipeline**

The Integrative Genomics Viewer (IGV) version 2.3.57 (<https://software.broadinstitute.org/software/igv/download>) was used to visualize and inspect the read alignments and variant calls. For detection of somatic mutations, we analyzed matched T cells in all cases and, if available, buccal swab (n = 35).

Annotations and high-stringency filtering of all variants were completed through an in-house pipeline. The filtering strategies to identify candidate overlapping and non-overlapping mutations are described in Supplementary Table 2. For our analysis, the

databases used to annotate variants included RefSeq

(<http://www.ncbi.nlm.nih.gov/RefSeq/>), the 1000 Genomes Project as of August 2015

(<http://www.internationalgenome.org/data>), dbSNP131

(<http://www.ncbi.nlm.nih.gov/projects/SNP/>), ToMMo version 1

(<https://ijgvd.megabank.tohoku.ac.jp/>), the Human Genetic Variation Database (HGVD)

as of October 2013 (<http://www.hgvd.genome.med.kyoto-u.ac.jp/>), ClinVar as of June

2015 (<https://www.ncbi.nlm.nih.gov/clinvar/>), the Human Gene Mutation Database

Professional (HGMD Pro) as of March 2015 (<http://www.hgmd.cf.ac.uk/ac/index.php>),

the cBioPortal for Cancer Genomics as of September 2015 (<http://cbioportal.org>), the

TumorPortal as of September 2015 (<http://www.tumorportal.org/>), the Catalogue Of

Somatic Mutations In Cancer (COSMIC) version 70

(<http://cancer.sanger.ac.uk/cosmic>), and ICGC Data Portal (<https://dcc.icgc.org/>). The

computational algorithms, Sorting Intolerant From Tolerant (SIFT available at

<http://sift-dna.org>), PolyPhen2 (<http://genetics.bwh.harvard.edu/pph2/>), and

MutationTaster (<http://www.mutationtaster.org/>) were used to predict whether

mutations were damaging.



## **STEP 5: Mutation validation**

**Sanger sequencing.** To experimentally validate identified mutations, we performed Sanger sequencing with standard procedures using unfractionated residual samples and, if available, paired controls. Briefly, PCR reactions were performed using primers and Platinum Taq DNA Polymerase High Fidelity (Invitrogen, San Diego, CA). DNA (50 ng) was amplified and PCR products were purified using a QIAquick PCR purification kit (Qiagen), followed by direct sequencing with an ABI3130 Genetic Analyzer (Applied Biosystems, CA, USA) using BigDye Terminator v3.1 chemistry (Thermo Fisher Scientific, Waltham, MA, USA). PCR conditions and primer sequences are available upon request.

In those cases in which limited residual samples were available, droplet digital PCR (ddPCR) or targeted deep sequencing using a different probe (QIASEQ) was performed for mutation confirmation as described below.

**ddPCR.** Gene-specific primers and hydrolysis probes for wild-type (6-carboxy-

2,4,4',5',7',7'-hexachlorofluorescein succinimidyl ester (HEX)-labeled) and mutant specific probes (6-carboxyfluorescein (FAM)-labeled) with a nonfluorescent quencher (black-hole quencher 1 (BHQ1)) were designed using Primer Express version 5.0 (Applied Biosystems, Inc., Foster City, CA, USA). Droplets were generated and run on a QX20 ddPCR platform (Bio-Rad, Hercules, CA, USA) according to manufacturer's instructions as previously described elsewhere.

**Targeted deep sequencing using a different probe.** The enrichment of 5,500 amplicons in 141 genes using the Myeloid Neoplasms Panel (Qiagen) followed by targeted deep sequencing was performed as described in STEP 3.

## Supplementary Tables

### Supplementary Table 1 (related to Figure 3). Clinicopathological characteristics of the patients in the study.

| Patient (UPN) | Age/ Gender | Clinical diagnosis by WHO2008 criteria | IPSS-R (MDS) or MRC (AML) risk | Prior at least 6month -lasing cytopenia before diagnosis | Prior documented MDS or MDS/MPN | Cytogenetics                                                 | Karyotype abnormality supporting AML-MRC including -7/del(7q) | Dysplasia > 50% in multilineages, supporting AML-MRC | Dysplasia > 10% in lineage(s), supporting MDS |
|---------------|-------------|----------------------------------------|--------------------------------|----------------------------------------------------------|---------------------------------|--------------------------------------------------------------|---------------------------------------------------------------|------------------------------------------------------|-----------------------------------------------|
| 1             | 83/M        | RARS                                   | Very Low                       | Yes                                                      | No                              | 45,X,-Y[20]                                                  | No                                                            | Yes                                                  | Yes                                           |
| 2             | 46/M        | MDS/MPN (CMML-1)                       | Very Low                       | Yes                                                      | Yes                             | 46,XX[20]                                                    | No                                                            | Yes                                                  | Yes                                           |
| 3             | 71/F        | MDS/MPN-u                              | Low                            | Yes                                                      | No                              | 46,XX[20]                                                    | No                                                            | No                                                   | Yes                                           |
| 4             | 66/M        | RCUD                                   | Low                            | Yes                                                      | No                              | 46,XY[20]                                                    | No                                                            | No                                                   | Yes                                           |
| 5             | 68/F        | RCUD                                   | Int                            | Yes                                                      | No                              | 46,XX[20]                                                    | No                                                            | No                                                   | Yes                                           |
| 6             | 63/M        | RCMD                                   | Int                            | Yes                                                      | No                              | 46,XY, del(20)(q11.2q13.3)[20]                               | No                                                            | Yes                                                  | Yes                                           |
| 7             | 57/M        | RCMD                                   | Int                            | Yes                                                      | Yes                             | 46,XY[20]                                                    | No                                                            | Yes                                                  | Yes                                           |
| 8             | 50/M        | RAEB-2                                 | High                           | Yes                                                      | Yes                             | 46,XY,-dup(1)(q21q42)[5]                                     | No                                                            | Yes                                                  | Yes                                           |
| 9             | 65/F        | RAEB-1                                 | High                           | Yes                                                      | Yes                             | 46,XX,der(5)t(1;5)(q21;q31)[11]                              | No                                                            | Yes                                                  | Yes                                           |
| 0             | 72/M        | RAEB-2                                 | Very High                      | Yes                                                      | Yes                             | 46,XY,+1,der(1;7)(q10;p10)[20]                               | Yes                                                           | Yes                                                  | Yes                                           |
| 11            | 74/M        | RAEB-2                                 | Very High                      | Yes                                                      | No                              | 43,XY,-3,-5,add(7)(q22),-12,-16,-17,-19,+mar1,+mar2,+mar3[8] | Yes                                                           | Yes                                                  | Yes                                           |

(Supplementary Table 1 continues)

(Supplementary Table 1 continued)

| Patient (UPN) | Age/Gender | Clinical diagnosis by WHO2008 criteria | IPSS-R (MDS) or MRC (AML) risk | Prior at least 6month -lasing cytopenia before dignosis | Prior documented MDS or MDS/MPN | Cytogenetics                                                                     | Karyotype abnormality supporting AML-MRC including -7/del(7q) | Dysplasia > 50% in multilineages, supporting AML-MRC | Dysplasia > 10% in lineage(s), supporting MDS |
|---------------|------------|----------------------------------------|--------------------------------|---------------------------------------------------------|---------------------------------|----------------------------------------------------------------------------------|---------------------------------------------------------------|------------------------------------------------------|-----------------------------------------------|
| 12            | 55/F       | RAEB-2                                 | Very High                      | Yes                                                     | Yes                             | 47,XX,+del(1)(p?),+mar1[5]                                                       | Yes                                                           | Yes                                                  | Yes                                           |
| 13            | 62/M       | RAEB-2                                 | Very High                      | Yes                                                     | Yes                             | 46,XY,dup(1)q21;q42[49]                                                          | No                                                            | Yes                                                  | Yes                                           |
| 14            | 46/M       | APL with t(15;17)(q22;q12)             | Favorable                      | No                                                      | No                              | 46,XY,t(15;17)(q22;q12)[17]                                                      | No                                                            | No                                                   | No                                            |
| 15            | 35/F       | APL with t(15;17)(q22;q12)             | Favorable                      | No                                                      | No                              | 46,XX,t(15;17)(q22;q12)[12]                                                      | No                                                            | No                                                   | No                                            |
| 16            | 39/M       | AML with inv(16)(p13.1q22)             | Favorable                      | No                                                      | No                              | 46,XY, inv(16)(p13.1q22)[20]                                                     | No                                                            | No                                                   | No                                            |
| 17            | 53/F       | APL with t(15;17)(q22;q12)             | Favorable                      | No                                                      | No                              | 46,XX,t(15;17)(q22;q12)[20]                                                      | No                                                            | No                                                   | No                                            |
| 18            | 37/M       | APL with t(15;17)(q22;q12)             | Favorable                      | No                                                      | No                              | 46,XY,t(15;17)(q22;q12)[20]                                                      | No                                                            | No                                                   | No                                            |
| 19            | 70/F       | AML with inv(16)(p13.1q22)             | Favorable                      | No                                                      | No                              | 48,XX,+9, inv(16)(p13.1q22), +22[11]                                             | No                                                            | No                                                   | No                                            |
| 20            | 49/M       | APL with t(15;17)(q22;q12)             | Favorable                      | No                                                      | No                              | 46,XY,t(15;17)(q22;q12)[20]                                                      | No                                                            | No                                                   | No                                            |
| 21            | 49/M       | AML with t(8;21)(q22;q22)              | Favorable                      | No                                                      | No                              | 46,XY,t(8;21)(q22;q22)[12]                                                       | No                                                            | No                                                   | No                                            |
| 22            | 53/M       | AML with inv(16)(p13.1q22)             | Favorable                      | No                                                      | No                              | 46,XY, inv(16)(p13.1q22) [12]                                                    | No                                                            | No                                                   | No                                            |
| 23            | 81/F       | AML with mutated <i>NPM1</i>           | Intermediate                   | No                                                      | No                              | 46,XX[20]                                                                        | No                                                            | No                                                   | No                                            |
| 24            | 43/M       | AML with mutated <i>NPM1</i>           | Intermediate                   | No                                                      | No                              | 46,XY[20]                                                                        | No                                                            | No                                                   | No                                            |
| 25            | 64/F       | AML-NOS                                | Int                            | No                                                      | No                              | 46,XX[20/20]                                                                     | No                                                            | No                                                   | Yes                                           |
| 26            | 34/F       | AML-NOS                                | Int                            | No                                                      | No                              | 46,XX[20]                                                                        | No                                                            | No                                                   | Yes                                           |
| 27            | 59/M       | AML-NOS                                | Int                            | Yes                                                     | No                              | 45,X,-Y[15]                                                                      | No                                                            | No                                                   | Yes                                           |
| 28            | 78/M       | AML-NOS                                | Int                            | No                                                      | No                              | 46,XY,t(1;14)(q42;q32)[19]                                                       | No                                                            | No                                                   | Yes                                           |
| 29            | 35/F       | AML-MRC                                | Int                            | Yes                                                     | Yes                             | 46,XX[20]                                                                        | No                                                            | No                                                   | Yes                                           |
| 30            | 75/M       | AML-MRC                                | Int                            | Yes                                                     | Yes                             | 46,XY[20]                                                                        | No                                                            | No                                                   | Yes                                           |
| 31            | 81/M       | AML-MRC                                | Int                            | Yes                                                     | Yes                             | 46,XY[20]                                                                        | No                                                            | Yes                                                  | Yes                                           |
| 32            | 76/M       | AML-MRC                                | Adverse                        | Yes                                                     | Yes                             | 44,XY,del(5)(q?), add(7)(q22), dic(10;19)(q11.2;q11) dic(16;17)(p11.2;p11.2)[13] | Yes                                                           | Yes                                                  | Yes                                           |

(Supplementary Table 1 continues)

(Supplementary Table 1 continued)

| Patient (UPN) | Age/ Gender | Clinical diagnosis by WHO2008 criteria | IPSS-R (MDS) or MRC (AML) risk | Prior at least 6month -lasing cytopenia before diagnosis | Prior documented MDS or MDS/MPN | Cytogenetics                                                                                                                                | Karyotype abnormality supporting AML-MRC including -7/del(7q) | Dysplasia > 50% in multilineages, supporting AML-MRC | Dysplasia > 10% in lineage(s), supporting MDS |
|---------------|-------------|----------------------------------------|--------------------------------|----------------------------------------------------------|---------------------------------|---------------------------------------------------------------------------------------------------------------------------------------------|---------------------------------------------------------------|------------------------------------------------------|-----------------------------------------------|
| 33            | 76/M        | AML-MRC                                | Adverse                        | No                                                       | Yes                             | 46,XY, del(7)(p?) [20]                                                                                                                      | Yes                                                           | No                                                   | Yes                                           |
| 34            | 46/M        | AML-MRC                                | Adverse                        | Yes                                                      | Yes                             | 46,XY,dup(3)(q21.q27) [20/20]                                                                                                               | Yes                                                           | Yes                                                  | Yes                                           |
| 35            | 41/F        | AML-MRC                                | Adverse                        | Yes                                                      | Yes                             | 45,XX,-2,inv(q21q26.2)del(5)(q?), -7,add(8)(q13),add(17)(q11.2), +mar1[3]                                                                   | Yes                                                           | Yes                                                  | Yes                                           |
| 36            | 58/M        | AML-MRC                                | Adverse                        | Yes                                                      | Yes                             | 45,XY,-7[11]                                                                                                                                | Yes                                                           | Yes                                                  | Yes                                           |
| 37            | 64/F        | AML-MRC                                | Adverse                        | Yes                                                      | Yes                             | 47,XX,+21,del(3)(q?) [19]                                                                                                                   | Yes                                                           | Yes                                                  | Yes                                           |
| 38            | 73/M        | AML-MRC                                | Adverse                        | No                                                       | Yes                             | 46,X,-Y,-7,del(9)(q?), add(17)(p11.2),+mar1,+mar2[5]                                                                                        | Yes                                                           | No                                                   | Yes                                           |
| 39            | 65/M        | AML-MRC                                | Adverse                        | Yes                                                      | Yes                             | 43,XY,t(2;11)(p21;q23), del(5)(q?), -1,i(7)(q10), dic(13;22)(p11.2;p11.2), der(15)t(1;15)(q21;q22)ins(15;?) (q22;?),add(16)(p11.2),-18 [13] | Yes                                                           | Yes                                                  | Yes                                           |
| 40            | 68/F        | AML-MRC                                | Adverse                        | Yes                                                      | Yes                             | 46,XX[20]                                                                                                                                   | Yes                                                           | Yes                                                  | Yes                                           |
| 41            | 72/F        | AML-MRC                                | Adverse                        | No                                                       | No                              | 45,XY,-7[7]                                                                                                                                 | Yes                                                           | Yes                                                  | Yes                                           |
| 42            | 36/F        | AML-MRC                                | Adverse                        | No                                                       | No                              | 46,XX,add(16)(p11.2) [20]                                                                                                                   | Yes                                                           | Yes                                                  | Yes                                           |
| 43            | 65/M        | AML-MRC                                | Adverse                        | No                                                       | No                              | 44,XY,del(5)(q?),-7,-11,add(11)(q13),add(12)(p11.2), -14,add(15)(p11.2), -16,add(19)(q13.1),+2mar[1]                                        | Yes                                                           | Yes                                                  | Yes                                           |
| 44            | 67/F        | AML-MRC                                | Adverse                        | No                                                       | No                              | 45,XX,del(5)(q?),add(14)(p11.2), -21,-22,+mar1[12]                                                                                          | Yes                                                           | No                                                   | Yes                                           |

**Abbreviations:** UPN, unique patient number; RCUD, refractory cytopenia with single lineage dysplasia; RCMD, refractory cytopenia with multilineage dysplasia; RARS, refractory anemia with ring sideroblasts; RAEB-1, refractory anemia with excess of

blasts-1; RAEB-2, refractory anemia with excess of blasts-2; MDS/MPN-u,  
myelodysplastic/myeloproliferative neoplasms, unclassifiable; CMML-1, chronic  
myelomonocytic leukemia-1; AML, acute myeloid leukemia; AML-NOS, AML-not  
otherwise specified; AML-MRC, AML with myelodysplasia-related changes; IPSS-R,  
revised international prognostic scoring system; MRC, prognostic scoring system by  
Medical Research Council Acute Myeloid Leukemia 10; Int, intermediate risk.

**Supplementary Table 2. List of genes and exons included in the myeloid panel.**

| Function             | Gene          | Targeted exon            | Function            | Gene            | Targeted exon    |
|----------------------|---------------|--------------------------|---------------------|-----------------|------------------|
| Spliceosome          | <i>SF3B1</i>  | 13–16                    | Signal Transduction | <i>CSF3R</i>    | 14–17            |
|                      | <i>SRSF2</i>  | 1                        |                     | <i>MPL</i>      | 10               |
|                      | <i>U2AF1</i>  | 2 + 6                    |                     | <i>NOTCH1</i>   | 26–28 + 34       |
|                      | <i>ZRSR2</i>  | full                     |                     | <i>BRAF</i>     | 15               |
| Chromatin Modifier   | <i>ATRX</i>   | 8–10 & 17–31             |                     | <i>CBL</i>      | 8 + 9            |
|                      | <i>ASXL1</i>  | 12                       |                     | <i>CBLB</i>     | 9 + 10           |
|                      | <i>BCOR</i>   | full                     |                     | <i>CBLC</i>     | 9 + 10           |
|                      | <i>BCORL1</i> | full                     |                     | <i>GNAS</i>     | 8 + 9            |
|                      | <i>EZH2</i>   | full                     |                     | <i>HRAS</i>     | 2 + 3            |
|                      | <i>KDM6A</i>  | full                     |                     | <i>KRAS</i>     | 2 + 3            |
|                      | <i>MLL</i>    | 5–8                      |                     | <i>NRAS</i>     | 2 + 3            |
| Cohesin Complex      | <i>RAD21</i>  | full                     |                     | <i>MYD88</i>    | 3–5              |
|                      | <i>STAG2</i>  | full                     |                     | <i>PTPN11</i>   | 3 + 13           |
|                      | <i>SMC3</i>   | 2 , 11 , 16 + 17         |                     | Tyrosine Kinase | <i>FLT3</i>      |
|                      | <i>SMC1A</i>  | 10, 13 , 19 ,23 ,25 + 28 | <i>KIT</i>          |                 | 2, 8–11, 13 + 17 |
| Transcription Factor | <i>CEBPA</i>  | full                     | <i>PDGFRA</i>       |                 | 12, 14, 18       |
|                      | <i>CUX1</i>   | full                     | <i>ABL1</i>         |                 | 4–6              |
|                      | <i>ETV6</i>   | full                     | <i>JAK2</i>         |                 | 12 + 14          |
|                      | <i>GATA1</i>  | 2                        | <i>JAK3</i>         | 13              |                  |
|                      | <i>GATA2</i>  | 2–6                      | DNA Methylation     | <i>DNMT3A</i>   | full             |
|                      | <i>IKZF1</i>  | full                     |                     | <i>IDH1</i>     | 4                |
|                      | <i>RUNX1</i>  | full                     |                     | <i>IDH2</i>     | 4                |
| Tumor Suppressor     | <i>PTEN</i>   | 5+7                      | <i>TET2</i>         | 3–11            |                  |
|                      | <i>TP53</i>   | 2-11                     | Cell Cycle          | <i>CDKN2A</i>   | full             |
|                      | <i>WT1</i>    | 7+9                      |                     | <i>FBXW7</i>    | 9 + 10 + 11      |
| Cellular Process     | <i>CALR</i>   | 9                        |                     |                 |                  |
|                      | <i>NPM1</i>   | 12                       |                     |                 |                  |
|                      | <i>PHF6</i>   | full                     |                     |                 |                  |
|                      | <i>SETBP1</i> | 4                        |                     |                 |                  |

## Supplementary Table 3. Overview of cell lineage level-targeted sequencing

### workflow.

#### STEP 1. Flowcytometry sorting by FACS Arial

- Blast/Granulocyte/T cell

#### STEP 2. Targeted deep sequencing

- 20ng DNA from tumor (blast and granulocyte) and control (T cell and/or buccal swab)
- Library prepared by Trusight Myeloid Panel (Illumina)
- Sequencing by reagents V3 (600 cycles) chemistry with 250 bp paired-end reads on MiSeq platform (Illumina)

#### STEP 3. Single nucleotide variants (SNVs) calling and structural variants (SVs) calling by two independent pipelines:

##### - SNVs calling

- Sequence-alignment (hg19) and SNVs calling by MiSeq Reporter pipeline
- Sequence-alignment (hg19) by Burrows-Wheeler Aligner mem (BWA) and SNVs calling by Genomon2 pipeline

##### - SVs calling

- Sequence-alignment (hg19) by BWA and SVs calling by Genomon-SV pipeline
- Sequence-alignment (hg19) by BWA and SVs calling by Pindel pipeline

#### STEP 4. Annotation and filtering variants by in-house pipeline

##### - 1. Annotation of all variants in STEP3 performed by in-house pipelines

##### - 2. Discard variants following high stringency filtering:

- Phred quality score less than 40 and/or Illumina QC filter: not "passing" results
- Indel repeat greater than 8
- Variant allele frequency (VAF) < 2%
- Less than 50x total read depth and/or less than 10 alternate support reads
- Strand biased support reads
- In sequencing error prone region by in-house database
- Regions of segmental duplications
- Synonymous, intronic (excluding splicing region), 3'-untranslated region (UTR), and 5'-UTR
- Observed in controls
  - Tumor/Control (T cell and/or buccal swab) with p value  $\geq 0.05$  by Fisher's exact test
- A minor allele frequency  $\geq 1\%$  in single nucleotide polymorphism (SNP) database (excluding clinically associated SNP)
  - Database: 1000 Genomes Project/NHLBI-ESP 5400 exomes/ToMMo/HGVD/dbSNP131nonflagged
- Functionally benign
  - SIFT score > 0.050 or PolyPhen2 score < 0.957 (excluding clinically associated SNVs/SVs registered in database)
    - Database: ClinVar or HGMD or COSMIC or cBioPortal or Tumor Portal or ICGC

##### - 3. Pick up the overlapping SNVs (MiSeq Reporter and Genomon2) and SVs (Genomon-SV and Pindel).

##### - 4. Pick up only reliable variants by IGV inspection.

##### - 5. Rescue variants discarded in STEP 4-2 or 4-3, which were highly reliable and highly deleterious by manual inspection.

- (e.g., germline SNVs and SVs with reliable support reads, clinical association of which were reported in ClinVar or HGMD database)

##### - 6. Pick up "overlapping" and "non-overlapping driver" variants following VAF criteria:

###### - Tier 1 "overlapping driver"

- VAF  $\geq 20\%$  in blast fraction with the same variant observed in granulocyte fraction (VAF  $\geq 2\%$ )

###### - Tier 2 "overlapping driver" (in case Tier1 overlapping drivers not available)

- $10\% < \text{VAF} < 20\%$  in blast fraction with the same variant observed in granulocyte fraction (VAF  $\geq 2\%$ )

###### - Tier 1 "non-overlapping driver"

- VAF  $\geq 20\%$  in blast fraction with the same variant not observed in granulocyte fraction

###### - Tier 2 "non-overlapping driver" (in case Tier1 non-overlapping drivers not available)

- $10\% < \text{VAF} < 20\%$  in blast fraction with the same variant not observed in granulocyte fraction

#### STEP 5. Validation of Tier 1 and Tier 2 variants in STEP4-5 using residual unfractionated samples in STEP1 either by:

##### - 1. Sanger sequencing

##### - 2. Droplet digital PCR (ddPCR) or another sequencing modality if Sanger sequencing was not available



**Supplementary Table 4. Validated mutations identified in the patients in the study.**

| UPN | Chr   | Start     | End       | Ref     | Alt | Gene          | Class                | Amino acid change | Database    | SIFT   | Poly-phen2 | Mutation Taster | Driver type     | Confirmed by |        |
|-----|-------|-----------|-----------|---------|-----|---------------|----------------------|-------------------|-------------|--------|------------|-----------------|-----------------|--------------|--------|
| 1   | chr2  | 198266834 | 198266834 | T       | C   | <i>SF3B1</i>  | nonsynonymous SNV    | p.K700E           | COSM84677   | 0.00 D | 1.00 D     | 1.00 D          | Overlapping     | Sanger       |        |
| 1   | chr4  | 106164863 | 106164863 | T       | G   | <i>TET2</i>   | nonsynonymous SNV    | p.L1244R          | COSMIC+2    | 0.00 D | 1.00 D     | 1.00 D          | Overlapping     | Sanger       |        |
| 2   | chr20 | 31022441  | 31022441  | -       | G   | <i>ASXL1</i>  | frameshift insertion | p.G646fs          | COSM1411076 | NA     | NA         | NA              | Overlapping     | Sanger       |        |
| 2   | chr4  | 55599321  | 55599321  | A       | T   | <i>KIT</i>    | nonsynonymous SNV    | p.D816V           | COSM1314    | 0.00 D | 0.96 D     | 1.00 A          | Overlapping     | Sanger       |        |
| 3   | chr1  | 115258747 | 115258747 | C       | T   | <i>NRAS</i>   | nonsynonymous SNV    | p.G12D            | COSM564     | 0.00 D | 0.40 B     | 1.00 D          | Overlapping     | Sanger       |        |
| 3   | chr21 | 36252878  | 36252878  | T       | C   | <i>RUNX1</i>  | nonsynonymous SNV    | p.R162G           | COSM24718   | 0.00 D | 1.00 D     | 1.00 D          | Overlapping     | Sanger       |        |
| 4   | chr2  | 25523008  | 25523008  | -       | G   | <i>DNMT3A</i> | frameshift insertion | p.P59fs           | COSMIC+2    | NA     | NA         | NA              | Non-overlapping | Target seq   |        |
| 4   | chr20 | 31022438  | 31022444  | CGGAGGG | -   | <i>ASXL1</i>  | frameshift deletion  | p.I641fs          | COSMIC+2    | NA     | NA         | NA              | Overlapping     | Sanger       |        |
| 5   | chr9  | 21971161  | 21971161  | T       | C   | <i>CDKN2A</i> | nonsynonymous SNV    | p.H66R            | COSM14253   | 0.26 T | 0.01 B     | 1.00 D          | Overlapping     | Sanger       |        |
| 6   | chr21 | 44524456  | 44524456  | G       | A   | <i>UZAF1</i>  | nonsynonymous SNV    | p.S34F            | COSM166866  | 0.00 D | 1.00 D     | 1.00 D          | Overlapping     | Sanger       |        |
| 7   | chr11 | 119149376 | 119149376 | C       | T   | <i>CBL</i>    | stopgain             | p.R462X           | COSM34079   | 0.72 T | NA         | NA              | 1.00 A          | Overlapping  | Sanger |
| 7   | chr2  | 25467099  | 25467099  | G       | -   | <i>DNMT3A</i> | stopgain             | p.Y592X           | COSM231573  | NA     | NA         | NA              | Overlapping     | Sanger       |        |
| 7   | chr2  | 25467101  | 25467101  | A       | T   | <i>DNMT3A</i> | nonsynonymous SNV    | p.Y592N           | COSMIC+2    | 0.05 D | 0.85 P     | 1.00 D          | Overlapping     | Sanger       |        |
| 7   | chr2  | 198266834 | 198266834 | T       | C   | <i>SF3B1</i>  | nonsynonymous SNV    | p.K700E           | COSM84677   | 0.00 D | 1.00 D     | 1.00 D          | Overlapping     | Sanger       |        |
| 7   | chr7  | 148512035 | 148512035 | C       | -   | <i>EZH2</i>   | frameshift deletion  | p.C548fs          | COSMIC+2    | NA     | NA         | NA              | Overlapping     | Sanger       |        |
| 8   | chr20 | 31022441  | 31022441  | -       | G   | <i>ASXL1</i>  | frameshift insertion | p.G646fs          | COSM1411076 | NA     | NA         | NA              | Overlapping     | Target seq   |        |
| 9   | chr2  | 198267484 | 198267484 | G       | A   | <i>SF3B1</i>  | nonsynonymous SNV    | p.R625C           | COSM110696  | 0.00 D | 0.99 D     | 1.00 D          | Overlapping     | Sanger       |        |
| 9   | chr4  | 106196914 | 106196914 | G       | -   | <i>TET2</i>   | frameshift deletion  | p.M1749fs         | COSMIC+2    | NA     | NA         | NA              | Overlapping     | Target seq   |        |
| 10  | chr12 | 12006443  | 12006449  | AAACTCT | -   | <i>ETV6</i>   | frameshift deletion  | p.G137fs          | COSMIC+2    | NA     | NA         | NA              | Overlapping     | Sanger       |        |

(Supplementary Table 4 continues)

## (Supplementary Table 4 continued)

| UPN | Chr   | Start     | End       | Ref     | Alt  | Gene                                         | Class                   | Amino acid change        | Database    | SIFT   | Poly-phen2 | Mutation Taster | Driver type     | Confirmed by     |                 |            |
|-----|-------|-----------|-----------|---------|------|----------------------------------------------|-------------------------|--------------------------|-------------|--------|------------|-----------------|-----------------|------------------|-----------------|------------|
| 10  | chr7  | 101882818 | 101882818 | C       | G    | <i>CUX1</i>                                  | nonsynonymous SNV       | p.L1281V                 | NO          | 0.00 D | 1.00 D     | 1.00 D          | Overlapping     | Sanger           |                 |            |
| 11  | chr17 | 7578190   | 7578190   | T       | C    | <i>TP53</i>                                  | nonsynonymous SNV       | p.Y220C                  | COSM99718   | 0.00 D | 1.00 D     | 1.00 D          | Overlapping     | Sanger           |                 |            |
| 12  | chr17 | 7579882   | 7579882   | C       | G    | <i>TP53</i>                                  | nonsynonymous SNV       | p.E11Q                   | COSM327260  | 0.03 D | 0.97 D     | 1.00 N          | Overlapping     | Sanger/ddPCR     |                 |            |
| 12  | chr18 | 42531907  | 42531907  | G       | A    | <i>SETBP1</i>                                | nonsynonymous SNV       | p.D868N                  | COSM1318400 | 0.00 D | 1.00 D     | 1.00 D          | Non-overlapping | Target seq       |                 |            |
| 12  | chr21 | 44514777  | 44514777  | T       | G    | <i>U2AF1</i>                                 | nonsynonymous SNV       | p.Q157P                  | COSM1318797 | 0.00 D | 0.74 P     | 1.00 D          | Overlapping     | ddPCR/Target seq |                 |            |
| 13  | chr21 | 44524456  | 44524456  | G       | A    | <i>U2AF1</i>                                 | nonsynonymous SNV       | p.S34F                   | COSM166866  | 0.00 D | 1.00 D     | 1.00 D          | Overlapping     | Sanger           |                 |            |
| 14  | chr4  | 106193989 | 106193992 | ACAG    | -    | <i>TET2</i>                                  | frameshift deletion     | p.N1484fs                | COSMIC+-2   | NA     | NA         | NA              | NA              | NA               | Non-overlapping | Target seq |
| 15  | chr11 | 32417908  | 32417911  | CCGA    | -    | <i>WT1</i>                                   | frameshift deletion     | p.S313fs                 | COSMIC+-2   | NA     | NA         | NA              | NA              | NA               | Non-overlapping | Target seq |
| 15  | chr11 | 32417917  | 32417923  | CAAGAGT | -    | <i>WT1</i>                                   | frameshift deletion     | p.T309fs                 | COSMIC+-2   | NA     | NA         | NA              | NA              | NA               | Non-overlapping | Target seq |
| 16  | chr1  | 115258747 | 115258747 | C       | G    | <i>NRAS</i>                                  | nonsynonymous SNV       | p.G12A                   | COSM565     | 0.00 D | 0.59 P     | 1.00 D          | Non-overlapping | Target seq       |                 |            |
| 16  | chr4  | 106197287 | 106197287 | G       | A    | <i>TET2</i>                                  | nonsynonymous SNV       | p.E1874K                 | COSM5945072 | 0.00 D | 1.00 D     | 1.00 D          | Non-overlapping | Target seq       |                 |            |
| 17  | chr13 | 28608251  | 28608251  | -       | -    | TGAGATCA<br>TATTCATAT<br><i>FLT3</i><br>TCTC | nonframeshift insertion | p.K602delins<br>REYEYDLK | COSM1317921 | NA     | NA         | NA              | NA              | NA               | Non-overlapping | Sanger     |
| 18  | chr13 | 28592642  | 28592642  | C       | A    | <i>FLT3</i>                                  | nonsynonymous SNV       | p.D835Y                  | COSM783     | 0.00 D | 1.00 D     | 1.00 D          | Non-overlapping | Sanger           |                 |            |
| 21  | chr4  | 55599320  | 55599320  | G       | C    | <i>KIT</i>                                   | nonsynonymous SNV       | p.D816H                  | COSM1311    | 0.01 D | 0.27 B     | 1.00 D          | Non-overlapping | Sanger           |                 |            |
| 22  | chr13 | 28592641  | 28592641  | T       | G    | <i>FLT3</i>                                  | nonsynonymous SNV       | p.D835A                  | COSM27650   | 0.00 D | 1.00 D     | 1.00 D          | Non-overlapping | Sanger           |                 |            |
| 23  | chr4  | 106182956 | 106182956 | -       | A    | <i>TET2</i>                                  | frameshift insertion    | p.L1332fs                | COSMIC+-2   | NA     | NA         | NA              | NA              | NA               | Overlapping     | Sanger     |
| 23  | chr4  | 106196537 | 106196537 | C       | T    | <i>TET2</i>                                  | stopgain                | p.Q1624X                 | COSM42020   | 0.22 T | NA         | NA              | 1.00 D          | Overlapping      | Sanger          |            |
| 23  | chr5  | 170837542 | 170837542 | -       | TCTG | <i>NPM1</i>                                  | frameshift insertion    | p.W288fs                 | COSM17559   | NA     | NA         | NA              | NA              | NA               | Non-overlapping | Sanger     |
| 24  | chr2  | 25457243  | 25457243  | G       | A    | <i>DNMT3A</i>                                | nonsynonymous SNV       | p.R882C                  | COSM53042   | 0.00 D | 1.00 D     | 1.00 D          | Overlapping     | Sanger           |                 |            |

(Supplementary Table 4 continues)

(Supplementary Table 4 continued)

| UPN | Chr   | Start     | End       | Ref              | Alt                                     | Gene          | Class                   | Amino acid change          | Database    | SIFT | Poly-phen2 | Mutation Taster | Driver type | Confirmed by    |        |                 |                   |
|-----|-------|-----------|-----------|------------------|-----------------------------------------|---------------|-------------------------|----------------------------|-------------|------|------------|-----------------|-------------|-----------------|--------|-----------------|-------------------|
| 24  | chr5  | 170837542 | 170837542 | -                | TCTG                                    | <i>NPM1</i>   | frameshift insertion    | p.W288fs                   | COSM17559   | NA   | NA         | NA              | NA          | Non-overlapping | Sanger |                 |                   |
| 24  | chr15 | 90631934  | 90631934  | C                | T                                       | <i>IDH2</i>   | nonsynonymous SNV       | p.R140Q                    | COSM41590   | 0.00 | D          | 1.00            | D           | 1.00            | D      | Non-overlapping | Sanger            |
| 25  | chr13 | 28608246  | 28608246  | -                | CCATTTGA<br>GATCATATT<br>CATATTCTC<br>T | <i>FLT3</i>   | nonframeshift insertion | p.E604delinsREY<br>EYDLKWE | COSMIC+-2   | NA   | NA         | NA              | NA          | NA              | NA     | Non-overlapping | Sanger            |
| 25  | chr4  | 106156729 | 106156729 | C                | T                                       | <i>TET2</i>   | stopgain                | p.R544X                    | COSM41850   | 1.00 | T          | NA              | NA          | 1.00            | D      | Overlapping     | Target seq        |
| 25  | chr4  | 106157755 | 106157755 | C                | T                                       | <i>TET2</i>   | stopgain                | p.Q886X                    | COSM100053  | 0.07 | T          | NA              | NA          | 1.00            | D      | Overlapping     | Sanger            |
| 25  | chr5  | 170837543 | 170837543 | -                | TCTG                                    | <i>NPM1</i>   | frameshift insertion    | p.W288fs                   | COSM158604  | NA   | NA         | NA              | NA          | NA              | NA     | Non-overlapping | ddPCR             |
| 26  | chr11 | 32417913  | 32417913  | -                | GTACAAGA                                | <i>WT1</i>    | frameshift insertion    | p.R312fs                   | COSM27300   | NA   | NA         | NA              | NA          | NA              | NA     | Overlapping     | Target seq        |
| 26  | chr12 | 112926852 | 112926852 | C                | A                                       | <i>PTPN11</i> | nonsynonymous SNV       | p.P491H                    | In HGMD     | 0.35 | T          | 0.84            | P           | 1.00            | D      | Overlapping     | Sanger            |
| 26  | chr2  | 25457242  | 25457242  | C                | T                                       | <i>DNMT3A</i> | nonsynonymous SNV       | p.R882H                    | COSM52944   | 0.03 | D          | 0.04            | B           | 1.00            | D      | Overlapping     | ddPCR             |
| 26  | chr21 | 36164567  | 36164567  | -                | T                                       | <i>RUNX1</i>  | frameshift insertion    | p.S436fs                   | COSMIC+-2   | NA   | NA         | NA              | NA          | NA              | NA     | Overlapping     | Target seq        |
| 27  | chr15 | 90631934  | 90631934  | C                | T                                       | <i>IDH2</i>   | nonsynonymous SNV       | p.R140Q                    | COSM41590   | 0.00 | D          | 1.00            | D           | 1.00            | D      | Overlapping     | Sanger/ddPCR      |
| 27  | chr3  | 105438902 | 105438902 | T                | C                                       | <i>CBLB</i>   | nonsynonymous SNV       | p.N466D                    | COSM149439  | 0.00 | D          | 0.04            | B           | 1.00            | D      | Overlapping     | Sanger            |
| 27  | chr5  | 170837543 | 170837543 | -                | TCTG                                    | <i>NPM1</i>   | frameshift insertion    | p.W288fs                   | COSM158604  | NA   | NA         | NA              | NA          | NA              | NA     | Non-overlapping | ddPCR             |
| 28  | chr1  | 36933434  | 36933434  | G                | A                                       | <i>CSF3R</i>  | nonsynonymous SNV       | p.T618I                    | COSM1737962 | 0.06 | T          | 1.00            | D           | 0.68            | D      | Overlapping     | Sanger            |
| 28  | chr19 | 33793138  | 33793138  | G                | -                                       | <i>CEBPA</i>  | frameshift deletion     | p.162fs                    | COSM18534   | NA   | NA         | NA              | NA          | NA              | NA     | Overlapping     | Target seq        |
| 28  | chr4  | 106190855 | 106190855 | G                | A                                       | <i>TET2</i>   | nonsynonymous SNV       | p.C1378Y                   | COSM211731  | 0.00 | D          | 1.00            | D           | 1.00            | D      | Overlapping     | Sanger            |
| 28  | chr4  | 106190874 | 106190874 | C                | A                                       | <i>TET2</i>   | nonsynonymous SNV       | p.D1384E                   | COSMIC+-2   | 0.00 | D          | 1.00            | D           | 1.00            | D      | Overlapping     | Sanger            |
| 29  | chr3  | 128200134 | 128200145 | CCTTCTTC<br>ATGG | -                                       | <i>GATA2</i>  | nonframeshift deletion  | p.T387_E391del             | COSMIC+-2   | NA   | NA         | NA              | NA          | NA              | NA     | Overlapping     | Sanger            |
| 30  | chr17 | 7579882   | 7579882   | C                | G                                       | <i>TP53</i>   | nonsynonymous SNV       | p.E11Q                     | COSM327260  | 0.03 | D          | 0.97            | D           | 1.00            | N      | Overlapping     | Sanger/Target seq |

(Supplementary Table 4 continues)

## (Supplementary Table 4 continued)

| UPN | Chr   | Start     | End       | Ref | Alt  | Gene          | Class                | Amino acid change | Database     | SIFT   | Poly-phen2 | Mutation Taster | Driver type     | Confirmed by      |                   |
|-----|-------|-----------|-----------|-----|------|---------------|----------------------|-------------------|--------------|--------|------------|-----------------|-----------------|-------------------|-------------------|
| 30  | chr17 | 74732959  | 74732959  | G   | C    | <i>SRSF2</i>  | nonsynonymous SNV    | p.P95R            | COSM211661   | 0.26 T | 0.99 D     | 1.00 D          | Overlapping     | Target seq        |                   |
| 30  | chr21 | 36231792  | 36231792  | C   | T    | <i>RUNX1</i>  | nonsynonymous SNV    | p.D198N           | COSM24721    | 0.00 D | 1.00 D     | 1.00 D          | Overlapping     | Sanger/Target seq |                   |
| 30  | chr4  | 106162564 | 106162564 | A   | T    | <i>TET2</i>   | nonsynonymous SNV    | p.I1160F          | COSMIC+2     | 0.00 D | 0.99 D     | 1.00 D          | Overlapping     | Sanger/Target seq |                   |
| 30  | chr4  | 106196937 | 106196937 | -   | GGCC | <i>TET2</i>   | frameshift insertion | p.H1757fs         | COSMIC+2     | NA     | NA NA      | NA NA           | Overlapping     | Target seq        |                   |
| 30  | chr9  | 21971161  | 21971161  | T   | C    | <i>CDKN2A</i> | nonsynonymous SNV    | p.H66R            | COSM14253    | 0.26 T | 0.01 B     | 1.00 D          | Overlapping     | Sanger/Target seq |                   |
| 30  | chrX  | 39933575  | 39933575  | G   | A    | <i>BCOR</i>   | stopgain             | p.R342X           | COSM518558   | 1.00 T | NA         | NA              | 1.00 A          | Overlapping       | Sanger/Target seq |
| 31  | chr19 | 33793183  | 33793183  | -   | G    | <i>CEBPA</i>  | frameshift insertion | p.P45fs           | COSMIC+2     | NA     | NA NA      | NA NA           | Overlapping     | Target seq        |                   |
| 31  | chr20 | 31022442  | 31022443  | GG  | -    | <i>ASXL1</i>  | frameshift deletion  | p.G646fs          | COSMIC+2     | NA     | NA NA      | NA NA           | Overlapping     | Sanger            |                   |
| 31  | chr3  | 128202759 | 128202759 | G   | A    | <i>GATA2</i>  | nonsynonymous SNV    | p.L321F           | COSM249853   | 0.01 D | 1.00 D     | 1.00 D          | Overlapping     | Target seq        |                   |
| 31  | chr4  | 55599320  | 55599320  | G   | T    | <i>KIT</i>    | nonsynonymous SNV    | p.D816Y           | Mutation Id: | 0.00 D | 0.94 D     | 1.00 D          | Overlapping     | Sanger            |                   |
| 31  | chr4  | 106157998 | 106157998 | C   | -    | <i>TET2</i>   | frameshift deletion  | p.Q967fs          | COSM1411076  | NA     | NA NA      | NA NA           | Overlapping     | Sanger            |                   |
| 31  | chr4  | 106197366 | 106197366 | T   | G    | <i>TET2</i>   | nonsynonymous SNV    | p.V1900G          | COSMIC+2     | 0.00 D | 1.00 D     | 1.00 D          | Overlapping     | Sanger            |                   |
| 32  | chr17 | 7578413   | 7578413   | C   | T    | <i>TP53</i>   | nonsynonymous SNV    | p.V80M            | COSM98966    | 0.00 D | 1.00 D     | 1.00 D          | Overlapping     | Sanger            |                   |
| 32  | chr19 | 33793253  | 33793253  | G   | -    | <i>CEBPA</i>  | frameshift deletion  | p.P23fs           | COSM18544    | NA     | NA NA      | NA NA           | Non-overlapping | Sanger/ddPCR      |                   |
| 32  | chr4  | 106157832 | 106157832 | -   | GC   | <i>TET2</i>   | frameshift insertion | :p.A911fs         | COSMIC+2     | NA     | NA NA      | NA NA           | Overlapping     | Sanger            |                   |
| 33  | chr1  | 115258747 | 115258747 | C   | T    | <i>NRAS</i>   | nonsynonymous SNV    | p.G12D            | COSM564      | 0.00 D | 0.40 B     | 1.00 D          | Overlapping     | Sanger            |                   |
| 33  | chr12 | 12022592  | 12022592  | -   | C    | <i>ETV6</i>   | frameshift insertion | p.Y233fs          | COSMIC+2     | NA     | NA NA      | NA NA           | Overlapping     | Sanger            |                   |
| 33  | chr17 | 74732959  | 74732959  | G   | A    | <i>SRSF2</i>  | nonsynonymous SNV    | p.P95L            | COSM146288   | 0.10 T | 0.46 P     | 1.00 D          | Overlapping     | Sanger            |                   |
| 33  | chr18 | 42531907  | 42531907  | G   | A    | <i>SETBP1</i> | nonsynonymous SNV    | p.D868N           | COSM1318400  | 0.00 D | 1.00 D     | 1.00 D          | Overlapping     | Sanger            |                   |

(Supplementary Table 4 continues)

## (Supplementary Table 4 continued)

| UPN | Chr   | Start     | End       | Ref                               | Alt | Gene          | Class                  | Amino acid change | Database    | SIFT | Poly-phen2 | Mutation Taster | Driver type | Confirmed by       |    |                          |
|-----|-------|-----------|-----------|-----------------------------------|-----|---------------|------------------------|-------------------|-------------|------|------------|-----------------|-------------|--------------------|----|--------------------------|
| 33  | chr20 | 31022403  | 31022425  | CACCACTG<br>CCATAGAG -<br>AGGCGGC | -   | <i>ASXL1</i>  | frameshift deletion    | p.E630fs          | COSM3720455 | NA   | NA         | NA              | NA          | Overlapping Sanger |    |                          |
| 33  | chr7  | 148523705 | 148523705 | G                                 | A   | <i>EZH2</i>   | stopgain               | p.Q250X           | COSMIC+-2   | 0.63 | T          | NA              | NA          | 1.00               | A  | Overlapping Sanger       |
| 34  | chr1  | 115258747 | 115258747 | C                                 | T   | <i>NRAS</i>   | nonsynonymous SNV      | p.G12D            | COSM564     | 0.00 | D          | 0.40            | B           | 1.00               | D  | Overlapping Sanger/ddPCR |
| 34  | chr11 | 119148990 | 119148990 | T                                 | C   | <i>CBL</i>    | nonsynonymous SNV      | p.C404R           | COSM34059   | 0.00 | D          | 1.00            | D           | 1.00               | D  | Overlapping Sanger       |
| 34  | chr18 | 42531907  | 42531907  | G                                 | A   | <i>SETBP1</i> | nonsynonymous SNV      | p.D868N           | COSM1318400 | 0.00 | D          | 1.00            | D           | 1.00               | D  | Overlapping Sanger       |
| 34  | chr21 | 36164630  | 36164630  | C                                 | G   | <i>RUNX1</i>  | nonsynonymous SNV      | p.Q415H           | COSMIC+-2   | 0.06 | T          | 1.00            | D           | 1.00               | D  | Overlapping Sanger       |
| 34  | chr21 | 44514777  | 44514777  | T                                 | C   | <i>U2AF1</i>  | nonsynonymous SNV      | p.Q157R           | COSM1724986 | 0.00 | D          | 0.99            | D           | 1.00               | D  | Overlapping Sanger       |
| 34  | chr21 | 44524456  | 44524456  | G                                 | A   | <i>U2AF1</i>  | nonsynonymous SNV      | p.S34F            | COSM166866  | 0.00 | D          | 1.00            | D           | 1.00               | D  | Overlapping Sanger       |
| 35  | chr2  | 198266834 | 198266834 | T                                 | C   | <i>SF3B1</i>  | nonsynonymous SNV      | p.K700E           | COSM84677   | 0.00 | D          | 1.00            | D           | 1.00               | D  | Overlapping Sanger       |
| 36  | chr2  | 25463175  | 25463177  | AGA                               | -   | <i>DNMT3A</i> | nonframeshift deletion | p.F772_L773del    | COSMIC+-2   | NA   | NA         | NA              | NA          | NA                 | NA | Overlapping Sanger       |
| 36  | chr2  | 209113113 | 209113113 | G                                 | A   | <i>IDH1</i>   | nonsynonymous SNV      | p.R132C           | COSM28747   | 0.00 | D          | 0.13            | B           | 1.00               | D  | Overlapping ddPCR        |
| 36  | chr20 | 31022441  | 31022441  | -                                 | G   | <i>ASXL1</i>  | frameshift insertion   | p.G646fs          | COSM1411076 | NA   | NA         | NA              | NA          | NA                 | NA | Overlapping Sanger       |
| 36  | chr21 | 36164697  | 36164697  | C                                 | -   | <i>RUNX1</i>  | frameshift deletion    | p.G393fs          | COSMIC+-2   | NA   | NA         | NA              | NA          | NA                 | NA | Non-overlapping Sanger   |
| 37  | chr2  | 198266834 | 198266834 | T                                 | C   | <i>SF3B1</i>  | nonsynonymous SNV      | p.K700E           | COSM84677   | 0.00 | D          | 1.00            | D           | 1.00               | D  | Overlapping Sanger       |
| 37  | chr21 | 36231792  | 36231792  | C                                 | T   | <i>RUNX1</i>  | nonsynonymous SNV      | p.D198N           | COSM24721   | 0.00 | D          | 1.00            | D           | 1.00               | D  | Overlapping Sanger       |
| 38  | chr17 | 7577120   | 7577120   | C                                 | T   | <i>TP53</i>   | nonsynonymous SNV      | p.R273H           | COSM99729   | 0.01 | D          | 0.99            | D           | 1.00               | A  | Overlapping Sanger       |
| 38  | chr21 | 36252866  | 36252866  | G                                 | A   | <i>RUNX1</i>  | stopgain               | p.R166X           | COSM24769   | 1.00 | T          | NA              | NA          | 1.00               | A  | Non-overlapping Sanger   |
| 38  | chr21 | 44514777  | 44514777  | T                                 | C   | <i>U2AF1</i>  | nonsynonymous SNV      | p.Q157R           | COSM1724986 | 0.00 | D          | 0.99            | D           | 1.00               | D  | Overlapping Sanger       |
| 38  | chr9  | 5073770   | 5073770   | G                                 | T   | <i>JAK2</i>   | nonsynonymous SNV      | p.V617F           | COSM12600   | 0.00 | D          | 0.93            | D           | 1.00               | D  | Overlapping Sanger       |

(Supplementary Table 4 continues)

(Supplementary Table 4 continued)

| UPN | Chr   | Start     | End       | Ref | Alt | Gene                                                                                                                                        | Class                   | Amino acid change                                | Database    | SIFT   | Poly-phen2 | Mutation Taster | Driver type     | Confirmed by     |
|-----|-------|-----------|-----------|-----|-----|---------------------------------------------------------------------------------------------------------------------------------------------|-------------------------|--------------------------------------------------|-------------|--------|------------|-----------------|-----------------|------------------|
| 39  | chr17 | 7578458   | 7578458   | G   | C   | <i>TP53</i>                                                                                                                                 | nonsynonymous SNV       | p.R65G                                           | COSM318153  | 0.00 D | 1.00 D     | 1.00 D          | Overlapping     | Sanger           |
| 39  | chr17 | 7579882   | 7579882   | C   | G   | <i>TP53</i>                                                                                                                                 | nonsynonymous SNV       | p.E11Q                                           | COSM327260  | 0.03 D | 0.97 D     | 1.00 N          | Overlapping     | Sanger           |
| 40  | chr1  | 115258747 | 115258747 | C   | T   | <i>NRAS</i>                                                                                                                                 | nonsynonymous SNV       | p.G12D                                           | COSM564     | 0.00 D | 0.40 B     | 1.00 D          | Overlapping     | Sanger/ddPCR     |
| 40  | chr21 | 44514777  | 44514777  | T   | C   | <i>U2AF1</i>                                                                                                                                | nonsynonymous SNV       | p.Q157R                                          | COSM1724986 | 0.00 D | 0.99 D     | 1.00 D          | Overlapping     | Sanger           |
| 40  | chr21 | 44524456  | 44524456  | G   | A   | <i>U2AF1</i>                                                                                                                                | nonsynonymous SNV       | p.S34F                                           | COSM166866  | 0.00 D | 1.00 D     | 1.00 D          | Overlapping     | Sanger/ddPCR     |
| 41  | chr4  | 106157946 | 106157946 | -   | G   | <i>TET2</i>                                                                                                                                 | frameshift insertion    | p.H949fs                                         | COSMIC+2    | NA     | NA NA      | NA NA           | Overlapping     | Sanger           |
| 41  | chr4  | 106180796 | 106180796 | G   | A   | <i>TET2</i>                                                                                                                                 | nonsynonymous SNV       | p.G1275E                                         | COSM110791  | 0.00 D | 1.00 D     | 1.00 D          | Overlapping     | Sanger           |
| 42  | chr1  | 115258747 | 115258747 | C   | T   | <i>NRAS</i>                                                                                                                                 | nonsynonymous SNV       | p.G12D                                           | COSM564     | 0.00 D | 0.40 B     | 1.00 D          | Overlapping     | ddPCR/Target seq |
| 42  | chr11 | 32417914  | 32417914  | -   | T   | <i>WT1</i>                                                                                                                                  | frameshift insertion    | p.R312fs                                         | COSM49053   | NA     | NA NA      | NA NA           | non-Overlapping | Target seq       |
| 42  | 13    | 28608487  | 28608487  | -   | -   | AGACAAAC<br>ACCAATTG<br>TTGCATAG<br>AATGAGAT<br>GTTGCTTT<br>GGATGAAA<br>GGGAAGGG<br>GCCTGCAA<br>CAAAAGAG<br>AGGACTCC<br>AATA<br><i>FLT3</i> | nonframeshift insertion | p.L552delinsLIG<br>VLSFVAGPFPIQ<br>DNISFYATIGVCL | COSMIC+2    | NA     | NA NA      | NA NA           | non-overlapping | Target seq       |
| 43  | chr17 | 7577545   | 7577545   | T   | C   | <i>TP53</i>                                                                                                                                 | nonsynonymous SNV       | p.M246V                                          | COSM251429  | 0.00 D | 0.99 D     | 1.00 D          | Overlapping     | Sanger           |
| 43  | chr17 | 7578406   | 7578406   | C   | T   | <i>TP53</i>                                                                                                                                 | nonsynonymous SNV       | p.R175H                                          | COSM3355994 | 0.00 D | 1.00 D     | 1.00 A          | Overlapping     | Sanger           |
| 44  | chr17 | 7574018   | 7574018   | G   | A   | <i>TP53</i>                                                                                                                                 | nonsynonymous SNV       | p.R337C                                          | COSM117591  | 0.00 D | 0.34 B     | 1.00 D          | Overlapping     | Sanger           |
| 44  | chr17 | 7577504   | 7577504   | G   | -   | <i>TP53</i>                                                                                                                                 | frameshift deletion     | p.S260fs                                         | COSM46112   | NA     | NA NA      | NA NA           | Overlapping     | Sanger           |

**Abbreviations:** UPN, unique patient number; Chr, chromosome; Start, variant base start position in hg19 coordinates; End, variant base end position in hg19 coordinates; Ref, reference base represented in hg19 coordinates; Alt, variant base in hg19 coordinates; Gene, gene symbol defined by the HUGO Gene Nomenclature Committee; Class, classification based on amino acid change pattern; Amino acid change, predicted

amino acid change for the variation; Database, evidence of variant by database registration (e.g., COSMIC ID); SIFT, Score (left column) and Deleterious (D)/Tolerated (T) status (right column) assigned by SIFT; Polyphen2, Score (left column) and Deleterious (D)/Probably deleterious (P)/Benign (B) status (right column) assigned by Polyphen2; Mutation Taster, Score (left column) and Deleterious (D)/Tolerated(T) status (right column) assigned by Mutation Taster; Driver type, overlapping status of mutation; Confirmed by: modality used for mutation confirmation; SNV, single nucleotide variation; COSMIC+-2; Variation identified not at the specific site, but within 2 bp, in COSMIC; Sanger, sanger sequencing; ddPCR, droplet digital PCR; WES, whole exome sequencing; RNA seq, RNA sequencing; Target seq, targeted sequencing using different probe; NA, not available.

## Supplementary Figures and Figure Legends

**Figure S1.**

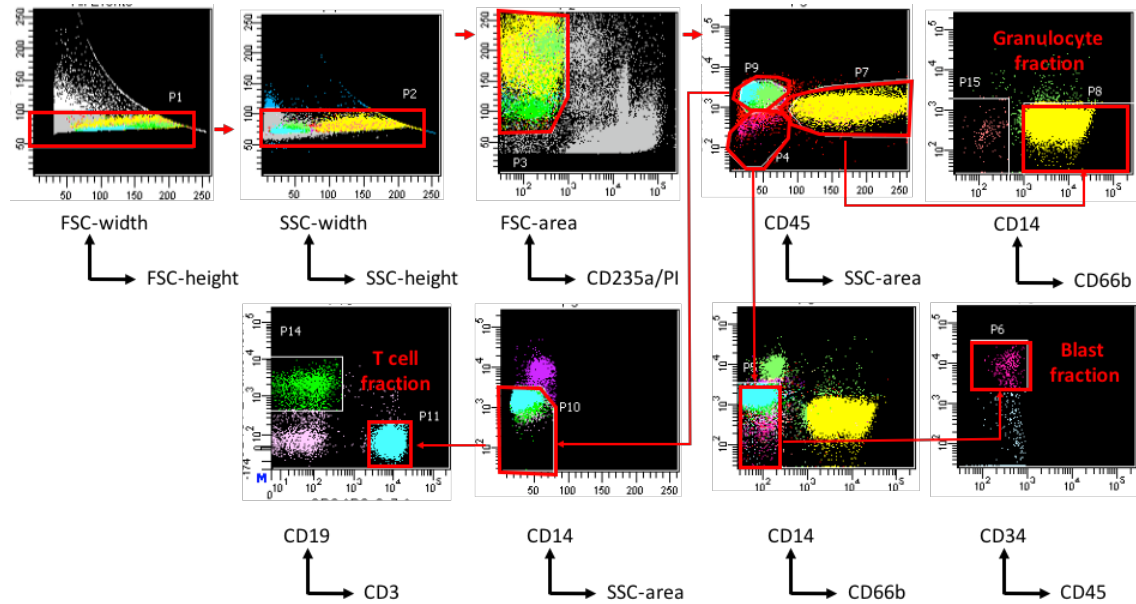

**Supplementary Figure 1.** Representative sorting plot of granulocyte, blast, and T cells

in a patient with myelodysplastic syndrome (unique patient number (UPN10)).

**Abbreviations:** FSC, forward scatter; SSC, side scatter.



**Figure S2.**

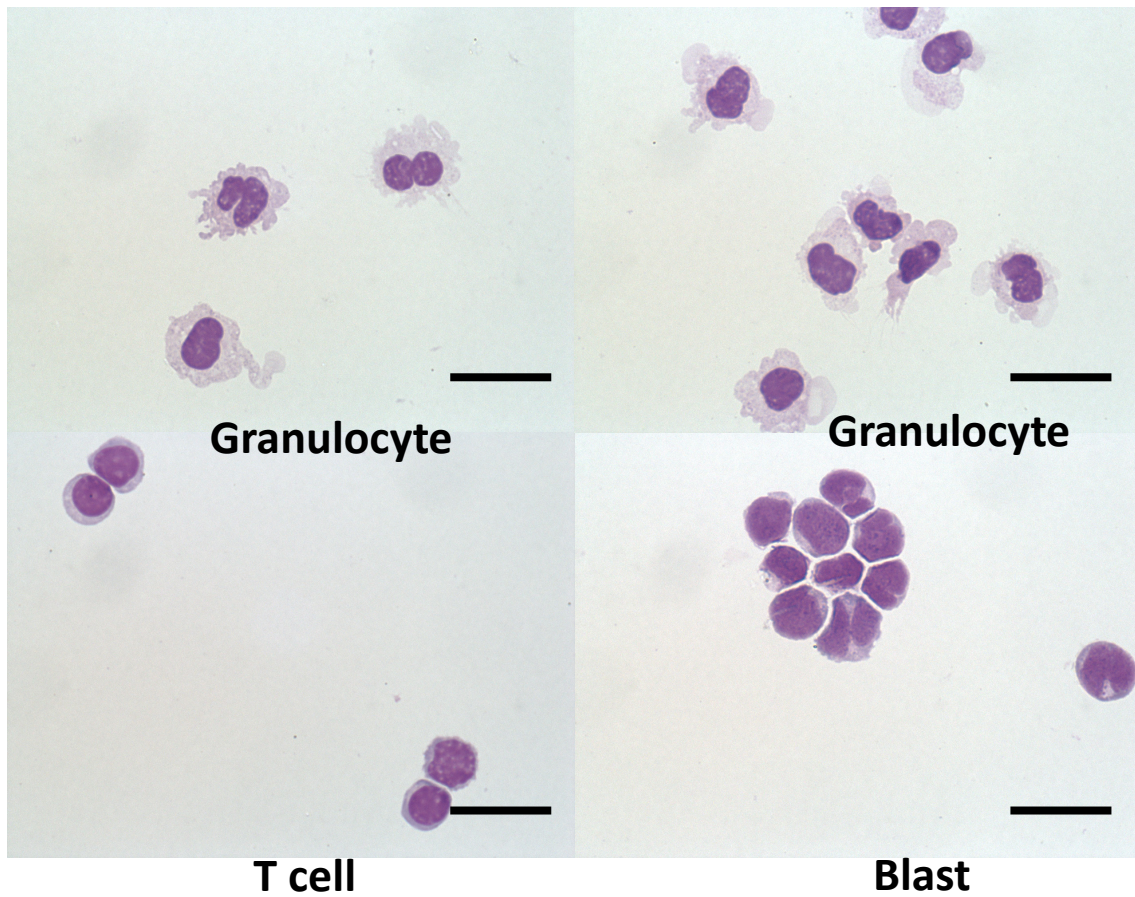

**Supplementary Figure 2.** Representative images of sorted trios in a patient with AML-MRC (UPN37) showing granulocytes, blasts, and T cells by cytospin followed by May-Grünwald-Giemsa staining. Scale bar indicate 20  $\mu$ m.

**Figure S3.**

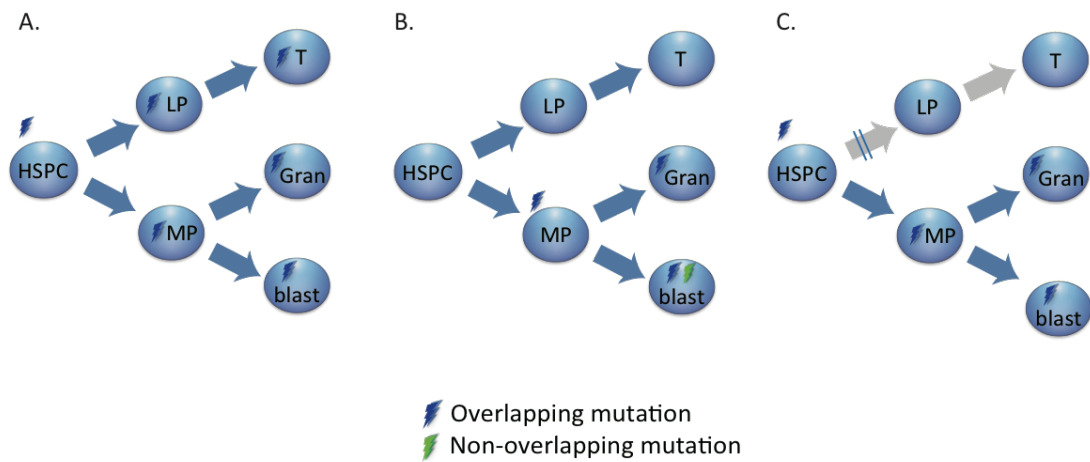

**Supplementary Figure 3. Model depicting clonal origin of overlapping mutation.**

The presence of overlapping mutation is indicated by blue thunder allows; non-overlapping mutation, green thunder allows. The dashed arrow with double strikethrough indicates that further lineage differentiation is inhibited. (A) If a mutation in the blast fraction is shared by both the granulocyte and T cell fraction, then presumable clonal origin is hematopoietic stem/multipotent progenitor cells (HSPC). If a mutation in the blast fraction is shared only by granulocyte, then presumable clonal

origin is either (B) myeloid progenitor (MP) or, alternatively, (C) HSPC, in which differentiation to lymphoid lineage might be inhibited. **Abbreviations:** Tc, T cell; Gran, granulocyte; LP, lymphoid progenitor cell.

**Figure S4.**

| Diagnosis   | UPN | Genetic alteration | HSPCs    | MP       | Blast | Granulo | Tcell |
|-------------|-----|--------------------|----------|----------|-------|---------|-------|
| de novo AML | 18  | PML/RARA (FISH)    | NA       | NA       |       |         |       |
|             |     | FLT3               | Negative | Negative |       |         |       |
|             | 16  | INV16 (FISH)       | NA       | NA       |       |         |       |
|             |     | TET2               | NA       | NA       |       |         |       |
|             |     | NRAS               | NA       | NA       |       |         |       |
| AML-MRC     | 29  | SRSF2              |          |          |       |         |       |
|             |     | ASXL1              |          |          |       |         |       |
|             |     | EZH2               |          |          |       |         |       |
|             |     | NRAS               | Negative | Negative |       |         |       |
|             |     | SETBP1             |          |          |       |         |       |
|             |     | ETV6               |          |          |       |         |       |
|             |     | -7q31(FISH)        | Negative | Negative |       |         |       |

**Supplementary Figure 4. Result of mutational screening of hematopoietic stem/multipotent progenitor fractions, along with trio fractions (granulocyte, blast, and T cell fractions) in representative cases of *de novo* AML and AML-MRC.**

Targeted deep sequencing combined with fluorescence in situ hybridization (FISH) analysis were performed. Overlapping and non-overlapping genetic alterations are shown as red and yellow rectangles, respectively. The variant allele frequency of each mutation or the frequency of cytogenetic alteration is indicated by the horizontal width of the rectangle, with a maximum value set at 50% or 100%, respectively.

**Abbreviations:** UPN, unique patient number; NA, not applicable; Negative, genetic alteration not detected either by FISH or CL; HSPCs, hematopoietic stem/multipotent

progenitor cells-enriched fraction (CD34+CD38-); MP, myeloid progenitor enriched  
fraction (CD34+CD38+); Granulo, granulocyte.

**Figure S5.**

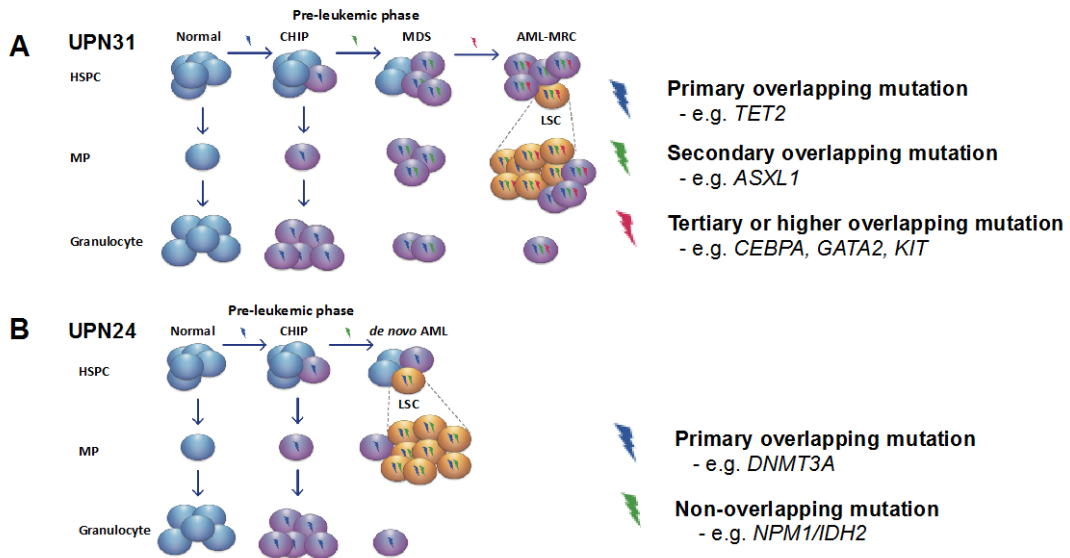

**Supplementary Figure 5. Proposed model depicting (B) MDS and AML-MRC**

**clonal ontogeny in contrast to (A) *de novo* AML.** (A) Shown is an inferred model of UPN24 depicting pre-leukemic phase (CHIP) initiated by a single overlapping mutation, MP, which rapidly evolved into *de novo* AML by acquisition of non-overlapping mutations. (B) Shown is an inferred model of UPN31 depicting pre-leukemic phase including CHIP and MDS which gradually evolved into AML-MRC by stepwise acquisition of overlapping mutations. The thunder bolts indicate mutations in each fraction. Abbreviations: HSPC, hematopoietic stem/multipotent progenitor cells; MP, myeloid progenitors.

**Figure S6.**

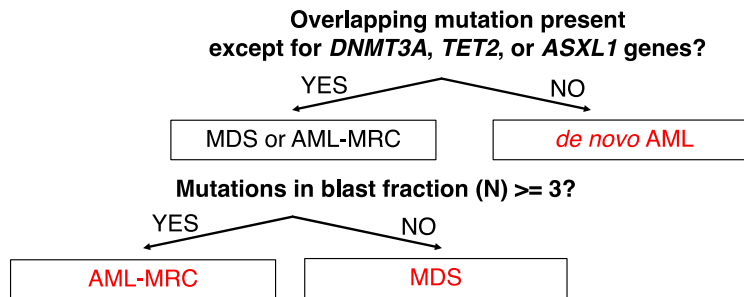

**Supplementary Figure 6.**

Shown is a hierarchical classification model for the three disease subsets including 1) *de novo* AML, 2) AML-MRC, and 3) MDS, based on recursive partitioning analysis.

**Figure S7.**

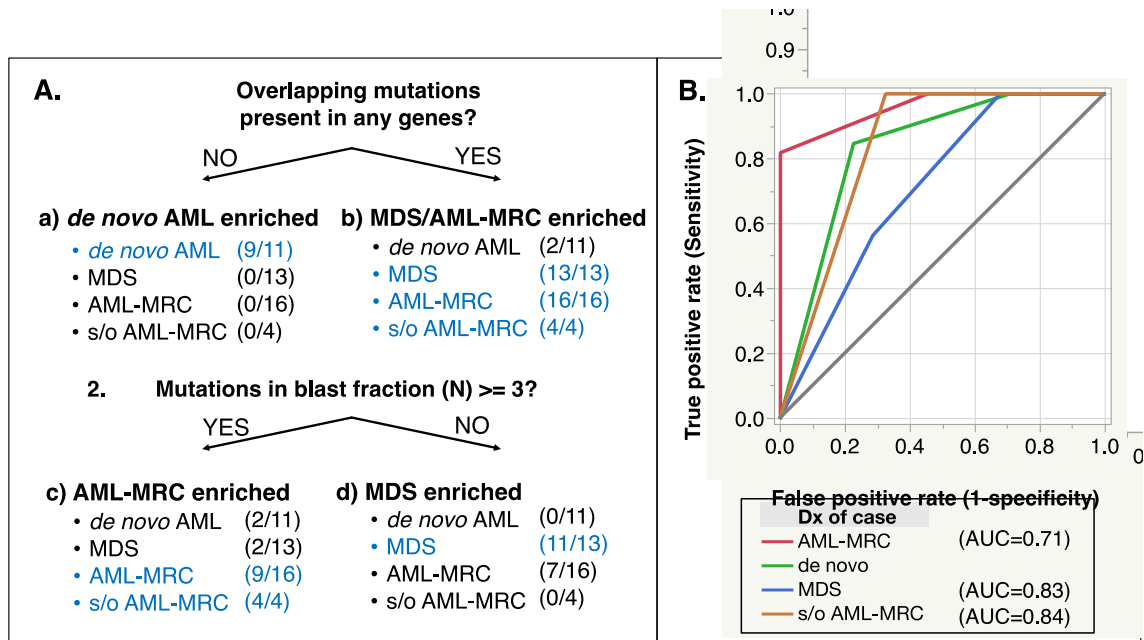

**Supplementary Figure 7. Disease classification model according to two mutational**

**indices identified by cell lineage level-targeted sequencing. (A)** Shown is the result

of a hierarchical classification model for three disease subsets when the mutational

index, the presence of overlapping mutation except for *DNMT3A*, *TET2*, and *ASXL1*,

could be removed in relative to Figure 7. In each subset generated by the partitioning

analysis, the enriched diseases are highlighted by blue characters. (B) Note that C-

statistics (AUC) of AML-MRC and *de novo* AML is slightly lower compared to the

result obtained in Figure 7B.
